# Supplementary material for: Compound events in Germany in 2018: drivers and case studies
Source: Copernicus journal article supplement (doi:10.5194/egusphere-2023-1460), 2023-08-11
Supplement: Supplementary file 1 [file egusphere-2023-1460-supplement.pdf]

Supplementary Figure (SOM)

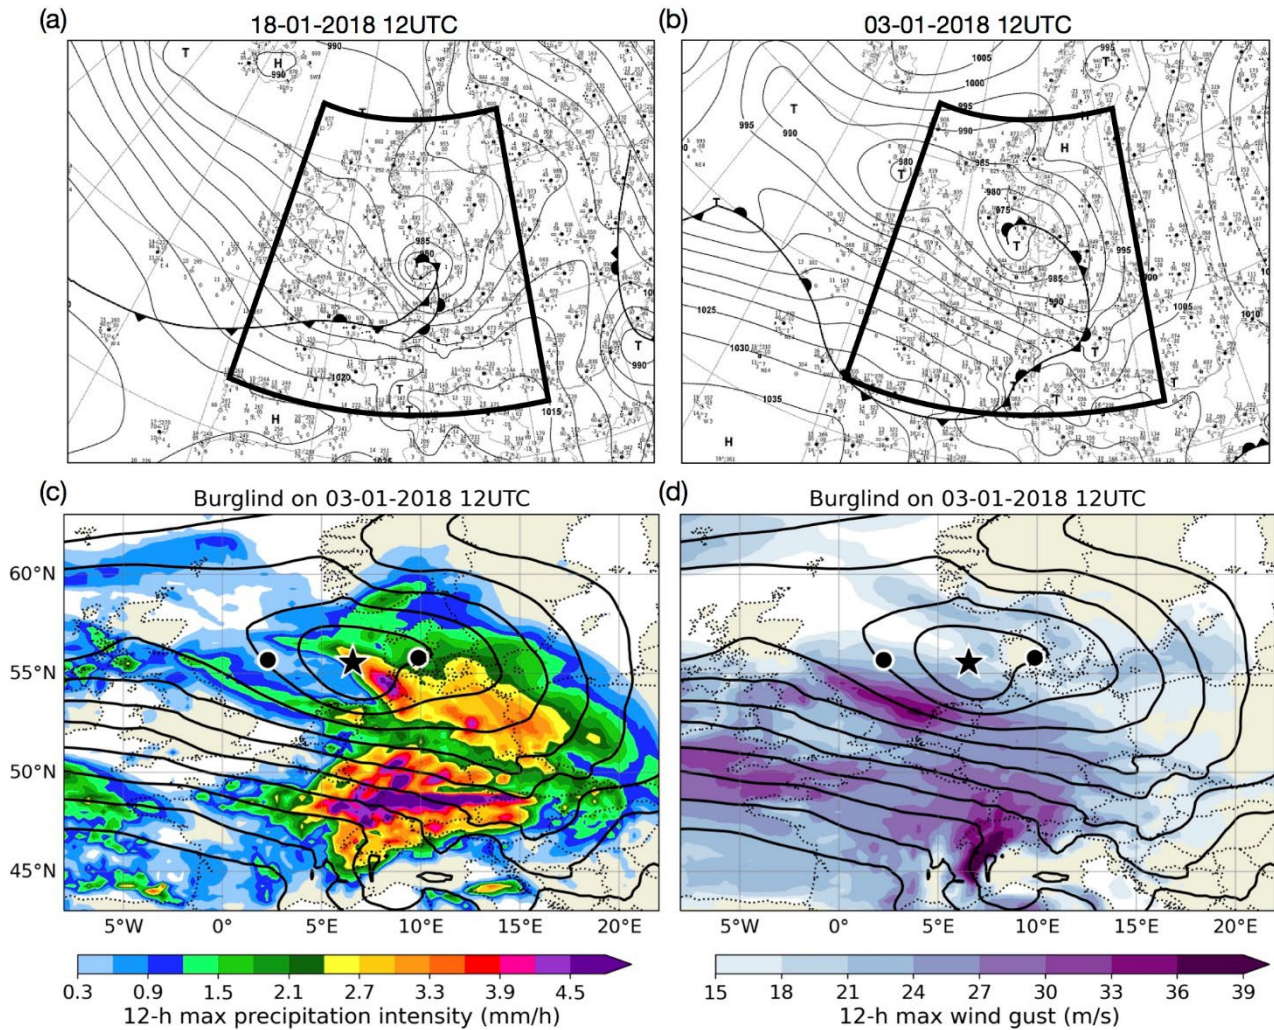

Figure S1: (a) Surface weather analysis produced by The Deutscher Wetterdienst (DWD) at 1200 UTC on 18 January 2018, when windstorm Friederike passed through Germany. (b) As (a) but on 3 January 2018 for windstorm Burglind. Charts were downloaded from Wetter3.de (n.d). (c) Mean sea level pressure (thick contours; increasing from 960 hPa with 5 hPa intervals) at 1200 UTC on 3 January 2018 (location of Burglind shown by the star) and maximum precipitation intensity (shaded) during 6 hours before and after (black circles) based on the ERA5 reanalysis. The corresponding region of this zoom-in view in the weather chart is indicated by the thick black lines in (a) & (b). (d) As b, but for the wind gust at 10 m height (shaded).
